# Supplementary material for: Sustained endocrine profiles of a girl with WAGR syndrome
Source: PubMed Central journal article supplement (PMC5654094; doi:10.1186/s12881-017-0477-5), 2017-10-23
Supplement: 12881_2017_477_MOESM1_ESM.pdf [file 12881_2017_477_MOESM1_ESM.pdf]

Supplementary Materials for  
Sustained endocrine and methylation profiles of a girl with WAGR syndrome

Yui Takada, Yasunari Sakai, Yuki Matsushita, Kazuhiro Ohkubo, Yuhki Koga, Satoshi Akamine, Michiko Torio, Yoshito Ishizaki, Masafumi Sanefuji, Hiroyuki Torisu, Chad A Shaw, Masayo Kagami, Toshiro Hara

This file contains the following items:

- Supplementary methods
- Table S1
- Fig S1
- Supplementary References

## Supplementary Methods

### *Cytogenetics*

Conventional technique of fluorescence *in situ* hybridization (FISH) was applied as previously described [1]. Briefly, RP1-74J1 (chr11:32,383,408-32,510,987) and 32-132011 (Vysis/Abbott Laboratories) were selected to probe *WT1* and *CCND1*, respectively. Spectrum Orange and Green (Chroma Technology Corp) were used to label these probes, and the probes were co-hybridized with fixed lymphocytes.

### *Copy number and gene expression analyses*

Standard protocols for microarray-based comparative genome hybridization (a-CGH) were used as previously described [1, 2]. The coordinates of genes and chromosomal breakpoints were defined according to the GRCh37/hg19 assembly at the UCSC genome browser (<http://genome.ucsc.edu/>). Quantitative (q) PCR assays were carried out with the SYBR Green system (ABI) according to the manufacturer's protocol. Oligonucleotide primers were designed with the Primer3 software (<http://bioinfo.ut.ee>). The primer sequences (5' to 3') used in this study were: CCAGGCCCAACAAGAATCAC and GTGAGAAGCTGGACCTCTGT (*WT1*); CATGAGGTGAGGCAAGCATC and AGGCTCTTGGTTCTGAAGCT (*PAX6*); GCCATATAGCCTCTGTCCCA and GCCCATAGTCAAATCCAGCC (*PRMT3*); TTCCCCTTTTAATGGTCAATG and GAACTCCCAGTGCCGAACTA (*BDNF*).

### *Methylation analysis*

Two µg of genomic DNA from the patient's leukocytes was treated with bisulfite. Differentially methylated regions with multiple CpG sites were PCR-amplified with the region-specific primer sets, as previously described [3]. The yielded PCR amplicons were then subjected to pyrosequencing analysis using PyroMark Q24 (Qiagen, Valencia, CA, USA). Methylation indexes were obtained accordingly, and the values for the CpG dinucleotide (CpG #7 in *PLAGL1*, **Supplementary Table 1**) was omit from analysis because it was located on a polymorphic site.

### *Ethics statement*

This study was approved by the institutional review board at Kyushu University (#461-00) and conducted with stringent compliance to the guidelines for genetic and clinical studies. Written informed consent was obtained from the parents for publication of this report.

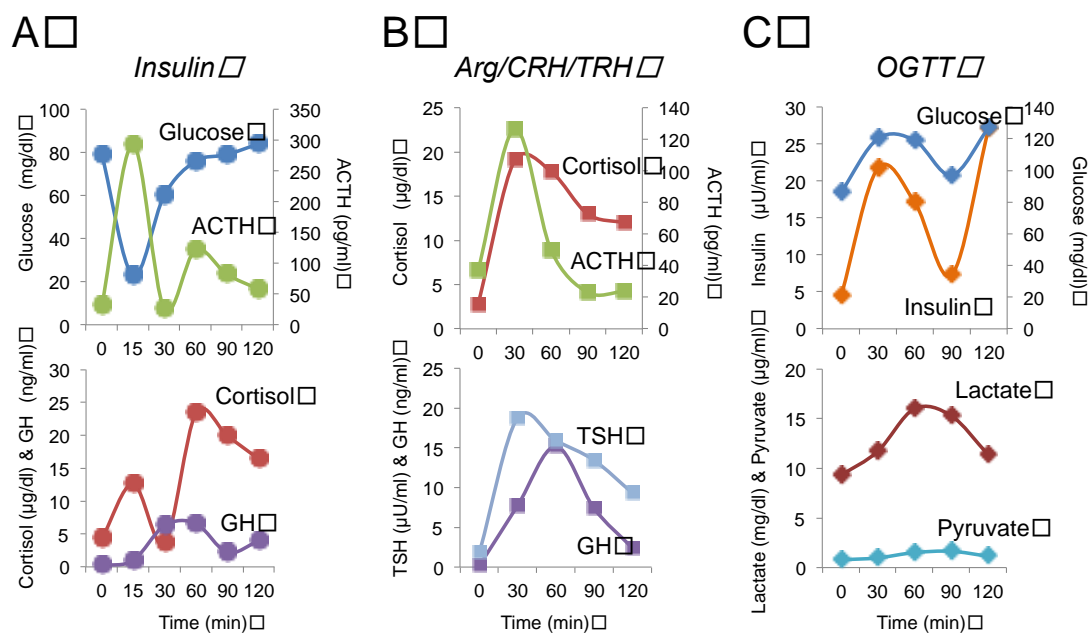

Fig S1. Neuro-endocrine profile of the present case

Time courses of indicated peptides are plotted as results of insulin tolerance (A), combined infusions of L-arginine, CRH and TRH (B), and oral glucose tolerance tests (C). Note that the present case cleared the diagnostic cut-off levels of ACTH and cortisol (3-fold increase), GH ( $\geq 6.0$  ng/ml) and TSH (robust increase after stimulations with no more than 25  $\mu$ U/ml of the peak value). No abnormal accumulation of the glucose, lactate or pyruvate was noted.

Supplementary Table 1. Methylation profile of the present case

| Gene Symbol<br>(Alias) | Band Locus    | Phenotype &<br>Disease<br>(MIM ID) | CpG<br>site | Methylation index (%) |          |        |     |     |
|------------------------|---------------|------------------------------------|-------------|-----------------------|----------|--------|-----|-----|
|                        |               |                                    |             | This<br>case          | Control  |        |     |     |
|                        |               |                                    |             |                       | <i>n</i> | Median | min | Max |
| H19                    | 11p15.5       | SRS <sup>a</sup><br>(103280)       | 1           | 63                    | 59       | 57     | 51  | 67  |
|                        |               |                                    | 2           | 62                    | 59       | 56     | 45  | 64  |
|                        |               |                                    | 3           | 58                    | 59       | 52     | 43  | 61  |
|                        |               |                                    | 4           | 58                    | 59       | 51     | 43  | 58  |
|                        |               |                                    | 5           | 53                    | 59       | 49     | 38  | 57  |
|                        |               |                                    | 6           | 50                    | 59       | 47     | 37  | 55  |
| MEST<br>(PEG1)         | 7q32.2        | SRS<br>(601029)                    | 1           | 58                    | 55       | 60     | 56  | 70  |
|                        |               |                                    | 2           | 57                    | 55       | 59     | 55  | 69  |
|                        |               |                                    | 3           | 53                    | 55       | 58     | 52  | 68  |
|                        |               |                                    | 4           | 59                    | 55       | 61     | 42  | 73  |
|                        |               |                                    | 5           | 58                    | 55       | 57     | 47  | 66  |
|                        |               |                                    | 6           | 61                    | 55       | 60     | 54  | 70  |
| PEG10                  | 7q21.3        | SRS<br>(609810)                    | 1           | 52                    | 48       | 56     | 50  | 59  |
|                        |               |                                    | 2           | 55                    | 48       | 55     | 50  | 59  |
|                        |               |                                    | 3           | 51                    | 48       | 53     | 48  | 59  |
|                        |               |                                    | 4           | 55                    | 48       | 54.5   | 50  | 59  |
|                        |               |                                    | 5           | 49                    | 48       | 50     | 45  | 55  |
| KCNQ1                  | 11p15.5-p15.4 | BWS <sup>b</sup><br>(607542)       | 1           | 56                    | 53       | 58     | 49  | 66  |
|                        |               |                                    | 2           | 56                    | 53       | 61     | 52  | 68  |
|                        |               |                                    | 3           | 50                    | 53       | 48     | 41  | 54  |
|                        |               |                                    | 4           | 51                    | 53       | 48     | 42  | 55  |
|                        |               |                                    | 5           | 58                    | 53       | 67     | 55  | 72  |
|                        |               |                                    | 6           | 59                    | 53       | 64     | 55  | 71  |
| PLAGL1/ZA<br>C1        | 6q24.2        | TNDM <sup>c</sup><br>*603044       | 1           | 45                    | 49       | 47     | 33  | 52  |
|                        |               |                                    | 2           | 45                    | 49       | 46     | 34  | 51  |
|                        |               |                                    | 3           | 52                    | 49       | 48     | 40  | 56  |

(Supplementary Table 1,  
continued)

|             |          |                                 |   |    |    |                 |    |    |
|-------------|----------|---------------------------------|---|----|----|-----------------|----|----|
| PLAGL1/ZAC1 |          |                                 | 4 | 40 | 49 | 39              | 31 | 47 |
|             |          |                                 | 5 | 49 | 49 | 50              | 44 | 58 |
|             |          |                                 | 6 | 52 | 49 | 49              | 41 | 55 |
|             |          |                                 | 7 |    |    | NA <sup>h</sup> |    |    |
|             |          |                                 | 8 | 56 | 49 | 53              | 47 | 58 |
| SNRPN       | 15q11.2  | PWS/AS <sup>d</sup><br>(182279) | 1 | 53 | 60 | 55              | 50 | 60 |
|             |          |                                 | 2 | 50 | 60 | 49              | 44 | 54 |
|             |          |                                 | 3 | 52 | 60 | 51              | 46 | 57 |
|             |          |                                 | 4 | 51 | 60 | 52              | 47 | 57 |
|             |          |                                 | 5 | 60 | 60 | 63              | 58 | 68 |
| GNAS        | 20q13.32 | PHP <sup>e</sup><br>(139320)    | 1 | 43 | 45 | 41              | 34 | 45 |
|             |          |                                 | 2 | 44 | 45 | 40              | 33 | 45 |
|             |          |                                 | 3 | 45 | 45 | 43              | 35 | 47 |
|             |          |                                 | 4 | 43 | 45 | 38              | 32 | 42 |
|             |          |                                 | 5 | 45 | 45 | 40              | 33 | 45 |
|             |          |                                 | 6 | 41 | 45 | 38              | 31 | 42 |
|             |          |                                 | 7 | 46 | 45 | 40              | 32 | 44 |
| MEG3        | 14q32.2  | KOS <sup>f</sup><br>(608149)    | 1 | 44 | 55 | 52              | 43 | 56 |
|             |          |                                 | 2 | 46 | 55 | 55              | 52 | 65 |
|             |          |                                 | 3 | 45 | 55 | 37              | 32 | 55 |
|             |          |                                 | 4 | 51 | 55 | 60              | 44 | 74 |
|             |          |                                 | 5 | 40 | 55 | 36              | 26 | 47 |
| IG          | 14q32.2  | KOS<br>(608149)                 | 1 | 59 | 56 | 58              | 49 | 68 |
|             |          |                                 | 2 | 56 | 56 | 54              | 40 | 62 |
|             |          |                                 | 3 | 66 | 56 | 68              | 54 | 78 |
|             |          |                                 | 4 | 54 | 56 | 53.5            | 43 | 64 |

<sup>a</sup>SRS, Silver-Russell syndrome; <sup>b</sup>BWS, Beckwith-Wiedeman syndrome; <sup>c</sup>TNDMc, transient neonatal diabetes mellitus; <sup>d</sup>PWS/AS, Prader-Willi syndrome/Angelman syndrome; <sup>e</sup>PHP, pseudohypoparathyroidism; <sup>f</sup>KOS, Kagami-Ogata syndrome; <sup>g</sup>TS, Temple syndrome; and <sup>h</sup>NA, not available.

### Supplementary References

1. Sakai Y, Ohkubo K, Matsushita Y, Akamine S, Ishizaki Y, Torisu H, Ihara K, Sanefuji M, Kim MS, Lee KU *et al*: **Neuroendocrine phenotypes in a boy with 5q14 deletion syndrome implicate the regulatory roles of myocyte-specific enhancer factor 2C in the postnatal hypothalamus.** *European journal of medical genetics* 2013, **56**(9):475-483.
2. Sakai Y, Shaw CA, Dawson BC, Dugas DV, Al-Mohtaseb Z, Hill DE, Zoghbi HY: **Protein interactome reveals converging molecular pathways among autism disorders.** *Science translational medicine* 2011, **3**(86):86ra49.
3. Kagami M, Kato F, Matsubara K, Sato T, Nishimura G, Ogata T: **Relative frequency of underlying genetic causes for the development of UPD(14)pat-like phenotype.** *European journal of human genetics : EJHG* 2012, **20**(9):928-932.
